# Supplementary material
Source: publisher figshare collection journal article supplement (https://future-science-group.figshare.com/ndownloader/files/28089552)

**Supplementary Figure 2**. Overall survival (a) and progression-free survival (b), stratified by age.

(a)


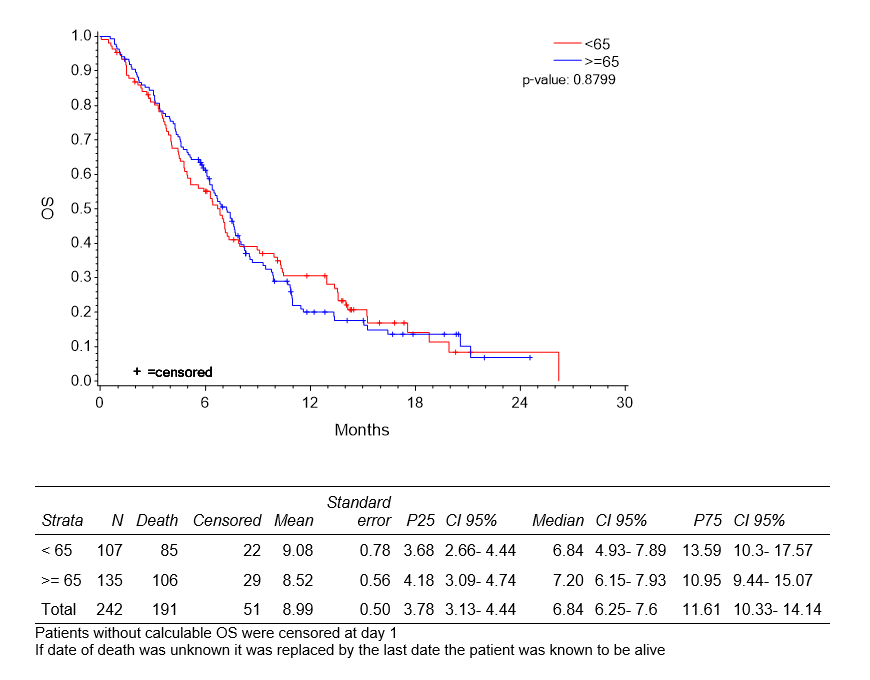


(b)


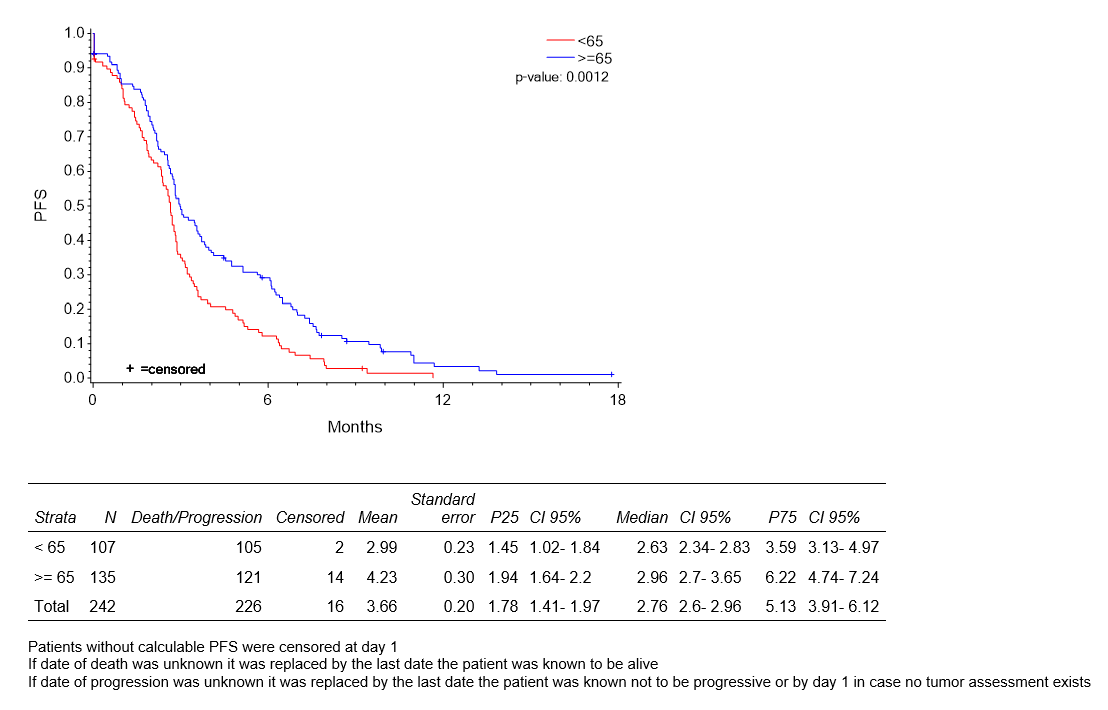

Supplement: Supplementary file 1 [file 28089552]
